# Supplementary material for: Establishing nurse-led active surveillance for men with localised prostate cancer: development and formative evaluation of a model of care in the ProtecT trial
Source: HighWire-hosted journal article supplement (doi:10.1136/bmjopen-2015-008953), 2015-09-01
Supplement: bmjopen-2015-008953supp_appendix-A.pdf [file bmjopen-2015-008953supp_appendix-A.pdf]

## Appendix A

### **Active Monitoring: a survey of the experiences of nurse-led follow up within the context of the ProtecT study:**

#### **Urologist views and comments:**

**1. How many years have you been involved in the ProtecT Study?**

**2. In your centre, do you have nurse-led follow up for participants on Active Monitoring?**

Yes ☐ No ☐

**3. Are you involved in the Active Monitoring follow-up of participants in the ProtecT Study?**

Yes ☐ No ☐

**3a. If “yes” please indicate which ‘type’ of appointments you see the participants at**

Clinical follow up  Annual review  Cancer review

**4. Nurse-led clinical follow up – benefits to the study participants?**

Do you think the Active Monitoring appointments provide?

**4a Psychological support**

Strongly agree ☐ Agree ☐ Neutral ☐ Disagree ☐ Strongly disagree ☐

**4b. Continuity of care**

|                       |                       |                       |                       |                       |                   |
|-----------------------|-----------------------|-----------------------|-----------------------|-----------------------|-------------------|
| Strongly agree        | Agree                 | Neutral               |                       | Disagree              | Strongly disagree |
| <input type="radio"/> |                   |

**4c. Flexibility of appointments e.g. Telephone and /or outreach. NB: “outreach” – some centres run clinics away from the main hospital or within primary care in order to maximise attendance rates.**

|                       |                       |                       |                       |                       |                   |
|-----------------------|-----------------------|-----------------------|-----------------------|-----------------------|-------------------|
| Strongly agree        | Agree                 | Neutral               |                       | Disagree              | Strongly disagree |
| <input type="radio"/> |                   |

**5. Nurse led clinical follow up – benefits to the Urologists?**

**5a. Reduced burden of appointments in standard NHS clinics**

|                       |                       |                       |                       |                       |                   |
|-----------------------|-----------------------|-----------------------|-----------------------|-----------------------|-------------------|
| Strongly agree        | Agree                 | Neutral               |                       | Disagree              | Strongly disagree |
| <input type="radio"/> |                   |

**5b. The clinics are cost effective?**

|                       |                       |                       |                       |                       |                   |
|-----------------------|-----------------------|-----------------------|-----------------------|-----------------------|-------------------|
| Strongly agree        | Agree                 | Neutral               |                       | Disagree              | Strongly disagree |
| <input type="radio"/> |                   |

**5c. Provide reliable and timely appointments for the men**

|                       |                       |                       |                       |                       |                   |
|-----------------------|-----------------------|-----------------------|-----------------------|-----------------------|-------------------|
| Strongly agree        | Agree                 | Neutral               |                       | Disagree              | Strongly disagree |
| <input type="radio"/> |                   |

**5d. Provide freedom for nurses to initiate diagnostic tests**

|                       |                       |                       |                       |                       |                   |
|-----------------------|-----------------------|-----------------------|-----------------------|-----------------------|-------------------|
| Strongly agree        | Agree                 | Neutral               |                       | Disagree              | Strongly disagree |
| <input type="radio"/> |                   |

**5e. Allow nurses to initiate direct referrals e.g Andrology**

|                |       |         |  |          |                   |
|----------------|-------|---------|--|----------|-------------------|
| Strongly agree | Agree | Neutral |  | Disagree | Strongly disagree |
|----------------|-------|---------|--|----------|-------------------|

☐ ☐ ☐ ☐ ☐

**5f. Do you feel your ProtecT nurses have sufficient specialist skills?**

Strongly agree      Agree      Neutral      Disagree      Strongly disagree

☐ ☐ ☐ ☐ ☐

**5g. Are there any other skills/tasks you would encourage the nurses in your centre to take on?**

**6a. Do you carry out or arrange any of these tests or examinations routinely rather than having nurses initiate them? i.e. tests/examinations that are not part of a 'cancer review'.**

Yes ☐      No ☐

**6b. If "yes" please indicate which tests**

DRE's ☐      Biopsy ☐      TRUS ☐      ☐      ☐

**7. Are there any other tests or examinations you feel should be done routinely?**

**If 'yes' what are the barriers that stop you from allowing the nurses to carry out these tasks?**

**8. Do you feel the men are receiving a good quality of care from the nurses?**

|                       |                       |                       |                       |                       |                       |
|-----------------------|-----------------------|-----------------------|-----------------------|-----------------------|-----------------------|
| Strongly agree        | Agree                 | Neutral               |                       | Disagree              | Strongly disagree     |
| <input type="radio"/> |

**9. What do you feel are the disadvantages of nurse-led follow up?**

**10. Optional: Please use the space below for any further comments about nurse-led follow up.**

**Thank you for taking the time to complete this survey**
