# Supplementary material for: Establishing nurse-led active surveillance for men with localised prostate cancer: development and formative evaluation of a model of care in the ProtecT trial
Source: HighWire-hosted journal article supplement (doi:10.1136/bmjopen-2015-008953), 2015-09-01
Supplement: bmjopen-2015-008953supp_appendix-B.pdf [file bmjopen-2015-008953supp_appendix-B.pdf]

## Appendix B

**Active Monitoring: a survey of the experiences of nurse-led clinics within the context of the ProtecT Study:****Nurses views and comments:**

1. How many years have you been involved in the ProtecT Study?

2. In your centre, do you have nurse-led follow up for participants on Active Monitoring?

Yes ☐

No ☐

3. Are you involved in the Active Monitoring follow-up of participants in the ProtecT Study?

Yes ☐

No ☐

4. If "yes" please indicate which type of appointments you see the men at:

Clinical follow up  Annual review  Cancer review

5. **Nurse-led clinical follow up: Benefits to participants?**

Do you think the Active Monitoring appointments provide?

**5a. Psychological support**

Strongly agree

Agree

Neutral

Disagree

Strongly disagree

☐                      ☐                      ☐                      ☐                      ☐

**5b. Continuity of care**

Strongly agree              Agree              Neutral                      Disagree              Strongly disagree

☐                      ☐                      ☐                      ☐                      ☐

**5c. Flexibility of appointments (i.e. face to face vs telephone vs outreach)**

Strongly agree              Agree              Neutral                      Disagree              Strongly disagree

☐                      ☐                      ☐                      ☐                      ☐

**6. Nurse-led clinical follow up: Benefits to nurses?**

Do you think the Active Monitoring appointments provide?

**6a. Autonomy in decision making**

Strongly agree              Agree              Neutral                      Disagree              Strongly disagree

☐                      ☐                      ☐                      ☐                      ☐

Please give examples

.....

**6b. Direct referral mechanisms**

Strongly agree              Agree              Neutral                      Disagree              Strongly disagree

☐                      ☐                      ☐                      ☐                      ☐

Please give examples

.....

**6c. Freedom to initiate diagnostic tests**

|                       |                       |                       |                       |                       |                   |
|-----------------------|-----------------------|-----------------------|-----------------------|-----------------------|-------------------|
| Strongly agree        | Agree                 | Neutral               |                       | Disagree              | Strongly disagree |
| <input type="radio"/> |                   |

Please give examples

.....

**6d. Direct admissions**

|                       |                       |                       |                       |                       |                   |
|-----------------------|-----------------------|-----------------------|-----------------------|-----------------------|-------------------|
| Strongly agree        | Agree                 | Neutral               |                       | Disagree              | Strongly disagree |
| <input type="radio"/> |                   |

Please give examples

.....

**6e. Specialist skills acquired**

|                       |                       |                       |                       |                       |                   |
|-----------------------|-----------------------|-----------------------|-----------------------|-----------------------|-------------------|
| Strongly agree        | Agree                 | Neutral               |                       | Disagree              | Strongly disagree |
| <input type="radio"/> |                   |

**6f. Please provide examples**

.....

**6g. Are there any additional skills/tasks you would like to take on?**

.....

.....

**7. Job satisfaction**

|                       |                       |                       |                       |                       |                   |
|-----------------------|-----------------------|-----------------------|-----------------------|-----------------------|-------------------|
| Strongly agree        | Agree                 | Neutral               |                       | Disagree              | Strongly disagree |
| <input type="radio"/> |                   |

**8. Do you feel the men are receiving a good quality of care?**

Strongly agree      Agree      Neutral      Disagree      Strongly disagree

☐      ☐      ☐      ☐      ☐

**9. What are the disadvantages of nurse-led follow up?**

**10. Optional: Please use the space below for any further comments about nurse-led follow up.**

**Thank you for taking the time to complete this survey**
