# Supplementary material for: Establishing nurse-led active surveillance for men with localised prostate cancer: development and formative evaluation of a model of care in the ProtecT trial
Source: HighWire-hosted journal article supplement (doi:10.1136/bmjopen-2015-008953), 2015-09-01
Supplement: bmjopen-2015-008953supp_appendix-C.pdf [file bmjopen-2015-008953supp_appendix-C.pdf]

## Appendix C

Interviewer credentials, occupation, gender and characteristics.

| Initials | Credentials | Occupation                                                                                                                 | Gender | Experience and training                                                                                                                                                     | Bias, assumptions, interests in research topic                                                                                                                                                                                                                                                                    |
|----------|-------------|----------------------------------------------------------------------------------------------------------------------------|--------|-----------------------------------------------------------------------------------------------------------------------------------------------------------------------------|-------------------------------------------------------------------------------------------------------------------------------------------------------------------------------------------------------------------------------------------------------------------------------------------------------------------|
| JW       | PhD         | Post-doctoral health services researcher / social scientist. Previous clinical experience as a speech & language therapist | F      | PhD. 2 years' FTE post doctoral experience at time of starting data collection for ProtecT study and 5 years' FTE at the time of starting data collection for the AS study. | At the time of the recruitment of the men in the ProtecT interview study, JW had no previous experience of working with men with PCa. Interview questions were derived from literature review and developed iteratively whilst interviews proceeded.                                                              |
| CES      | RGN         | Research nurse employed on ProtecT study.                                                                                  | F      | 8 years' experience working as a research nurse on the ProtecT study                                                                                                        | At the time of interviews CES was working part time as a research nurse on the ProtecT study and as a counsellor outside of the ProtecT study. Her experiences working within ProtecT may have led her to make particular assumptions about care in conducting interviews. She was not involved in data analysis. |
| LR       | PhD         | Health Services Researcher / Social Scientist                                                                              | F      | 1 year post doctoral experience at the time of starting data collection for the AS study.                                                                                   | LR had no previous experience working with men with PCa so came to the data afresh and led in the analysis of the data from the AS study.                                                                                                                                                                         |
